# Supplementary material
Source: Frontiers journal article supplement (https://www.frontiersin.org/articles/517503)
Supplement: Data_Sheet_1.PDF [file Data_Sheet_1.PDF]

## **ONLINE SUPPLEMENT**

**Prediction for the Total MRI Burden of Cerebral Small Vessel Disease with Retinal Microvascular Abnormalities in Ischemic Stroke/TIA Patients - - online supplement**

**Table I. Clinical features of patients with different SVD**

|                                                         | LI (n=204)   | CMBs (n=110)   | EPVS (n=126)     | WMH (n=68)    |
|---------------------------------------------------------|--------------|----------------|------------------|---------------|
| Age, Median (Interquartile)                             | 63.5 (54~73) | 65.0 (56~74.5) | 65.0 (56.8~73.3) | 71.0 (63~78)  |
| Male, n (%)                                             | 147 (72.1)   | 84 (76.4)      | 91 (72.2)        | 45 (66.2)     |
| Hypertension, n (%)                                     | 144 (70.6)   | 80 (72.7)      | 101 (80.2)       | 52 (76.5)     |
| Diabetes mellitus, n (%)                                | 72 (35.3)    | 34 (30.9)      | 53 (42.1)        | 20 (29.4)     |
| Hyperlipidemia, n (%)                                   | 81 (39.7)    | 45 (40.9)      | 53 (42.1)        | 22 (32.4)     |
| Hyperhomocysteinemia, n (%)                             | 10 (4.9)     | 6 (5.5)        | 4 (3.2)          | 4 (5.9)       |
| Atrial Fibrillation, n (%)                              | 15 (7.4)     | 6 (5.5)        | 10 (7.9)         | 6 (8.8)       |
| Previous Stroke/TIA, n (%)                              | 39 (19.1)    | 21 (19.1)      | 29 (23.0)        | 17 (25.0)     |
| Current Smoking, n (%)                                  | 91 (44.6)    | 48 (43.6)      | 53 (42.1)        | 23 (33.8)     |
| Alcohol Consumption, n (%)                              | 32 (15.7)    | 19 (17.3)      | 25 (19.8)        | 11 (16.2)     |
| TIA, n (%)                                              | 11 (5.4)     | 4 (3.6)        | 10 (7.9)         | 1 (1.5)       |
| The Keith–Wagener–Barker Grades, median (Interquartile) | 1.0 (0~2.0)  | 2.0 (1.0~2.0)  | 2.0 (1.0~2.0)    | 2.0 (1.0~2.0) |

cSVD, cerebral small vessel disease; WMHs, white matter hyperintensities; CMBs, cerebral microbleeds;

EPVS, enlarge perivascular spaces; LI, lacunar infarcts.

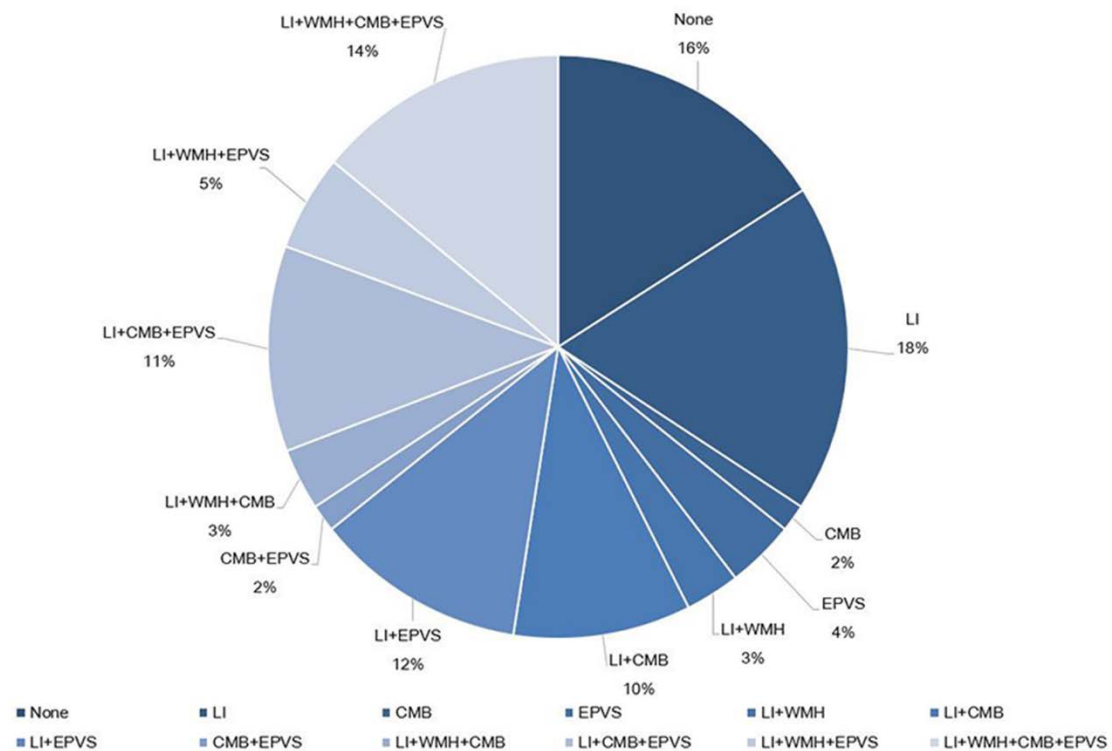

**Figure I. The Frequencies of cSVD Markers.** Due to all cSVD markers was seen in the patents with total cSVD score 4, the data of the combination was not shown in this figure. WMHs, white matter hyperintensities; CMBs, cerebral microbleeds; EPVS, enlarge perivascular spaces; LI, lacunar infarcts. In all the included patients, there were several patterns of total cSVD score markers including 1) LI only, 2) CMBs only, 3) EPVS only, 4) WMHs+LI, 5) CMBs+LI, 6) LI+EPVS, 7) LI+WMHs+CMBs , 8) LI+WMHs+EPVS , 9) LI+WMHs+EPVS, 10) LI+CMBs+EPVS , 11) LI+WMHs+EPVS+CMBs.
